# Supplementary material for: Improving the effectiveness of service delivery in the public healthcare sector: the case of ophthalmology services in Malaysia
Source: PubMed Central journal article supplement (PMC4551382; doi:10.1186/s12913-015-1011-0), 2015-08-28
Supplement: 12913_2015_1011_MOESM2_ESM.pdf [file 12913_2015_1011_MOESM2_ESM.pdf]

Additional file 2 Input and Output data (2011 & 2012)

| DMU | Year 2011 |              |    |    |    |    |    |      |               |      |    |     |       |      |      |        |    |
|-----|-----------|--------------|----|----|----|----|----|------|---------------|------|----|-----|-------|------|------|--------|----|
|     | Index     | Input levels |    |    |    |    |    |      | Output levels |      |    |     |       |      |      |        |    |
|     |           | x2           | x3 | x5 | x6 | x7 | x8 | x9   | y1            | y2   | y3 | y4  | y5    | y6   | y7   | y8     | y9 |
| 1   | 64        | 1            | 0  | 3  | 1  | 1  | 0  | 311  | 20            | 0    | 0  | 0   | 3695  | 488  | 0.01 | 0.0000 |    |
| 2   | 80        | 3            | 4  | 3  | 4  | 2  | 0  | 738  | 24            | 0    | 0  | 0   | 11394 | 166  | 0.06 | 0.0000 |    |
| 3   | 52        | 2            | 3  | 5  | 2  | 2  | 1  | 553  | 0             | 0    | 0  | 0   | 17694 | 329  | 0.09 | 0.0000 |    |
| 4   | 77        | 3            | 2  | 4  | 1  | 1  | 0  | 891  | 6             | 0    | 0  | 0   | 24500 | 1576 | 0.07 | 0.0000 |    |
| 5   | 42        | 1            | 3  | 4  | 2  | 1  | 0  | 318  | 0             | 0    | 0  | 0   | 12346 | 625  | 0.08 | 0.0000 |    |
| 6   | 48        | 1            | 1  | 1  | 1  | 0  | 1  | 75   | 3             | 0    | 0  | 0   | 5303  | 208  | 0.06 | 0.0000 |    |
| 7   | 64        | 2            | 1  | 2  | 1  | 1  | 0  | 237  | 63            | 0    | 0  | 0   | 4277  | 209  | 0.09 | 0.0000 |    |
| 8   | 320       | 15           | 11 | 16 | 3  | 2  | 2  | 1980 | 84            | 108  | 41 | 65  | 53203 | 2350 | 0.09 | 0.0000 |    |
| 9   | 128       | 7            | 7  | 27 | 2  | 2  | 1  | 1630 | 42            | 67   | 48 | 58  | 33815 | 1963 | 0.09 | 0.0025 |    |
| 10  | 65        | 3            | 3  | 2  | 1  | 2  | 1  | 713  | 11            | 0    | 0  | 0   | 19896 | 848  | 0.13 | 0.0000 |    |
| 11  | 150       | 6            | 4  | 25 | 2  | 2  | 1  | 2648 | 0             | 347  | 0  | 0   | 54582 | 1923 | 0.06 | 0.0000 |    |
| 12  | 72        | 4            | 1  | 4  | 1  | 2  | 0  | 325  | 0             | 0    | 0  | 0   | 13295 | 49   | 0.03 | 0.0000 |    |
| 13  | 160       | 7            | 6  | 23 | 4  | 2  | 1  | 1577 | 21            | 74   | 0  | 0   | 25018 | 1858 | 0.12 | 0.0023 |    |
| 14  | 90        | 6            | 5  | 10 | 3  | 3  | 2  | 911  | 28            | 195  | 0  | 0   | 28075 | 1533 | 0.10 | 0.0000 |    |
| 15  | 298       | 22           | 7  | 11 | 4  | 4  | 3  | 1813 | 83            | 1295 | 0  | 159 | 43362 | 1871 | 0.09 | 0.0005 |    |
| 16  | 180       | 8            | 4  | 7  | 2  | 2  | 0  | 673  | 0             | 0    | 0  | 287 | 19548 | 2795 | 0.10 | 0.0000 |    |
| 17  | 56        | 1            | 3  | 3  | 1  | 1  | 0  | 435  | 2             | 0    | 0  | 0   | 11977 | 642  | 0.06 | 0.0000 |    |
| 18  | 72        | 2            | 3  | 1  | 0  | 1  | 0  | 505  | 0             | 0    | 0  | 0   | 12984 | 907  | 0.22 | 0.0000 |    |
| 19  | 108       | 4            | 5  | 5  | 1  | 1  | 0  | 811  | 1             | 0    | 0  | 0   | 17353 | 1059 | 0.06 | 0.0000 |    |
| 20  | 77        | 3            | 4  | 4  | 2  | 2  | 1  | 674  | 0             | 0    | 0  | 0   | 15803 | 1003 | 0.07 | 0.0000 |    |
| 21  | 48        | 2            | 3  | 4  | 2  | 1  | 0  | 285  | 0             | 0    | 0  | 0   | 11307 | 585  | 0    | 0.0000 |    |

|         |       |     |     |     |     |     |     |       |      |      |      |      |         |        |      |        |
|---------|-------|-----|-----|-----|-----|-----|-----|-------|------|------|------|------|---------|--------|------|--------|
| 22      | 192   | 6   | 4   | 10  | 4   | 3   | 2   | 1156  | 36   | 349  | 0    | 10   | 40705   | 1987   | 0.09 | 0.0000 |
| 23      | 128   | 6   | 5   | 6   | 2   | 1   | 1   | 778   | 27   | 70   | 0    | 0    | 23076   | 839    | 0.06 | 0.0000 |
| 24      | 164   | 7   | 3   | 6   | 2   | 2   | 0   | 450   | 4    | 0    | 365  | 0    | 20251   | 472    | 0.08 | 0.0000 |
| 25      | 74    | 3   | 5   | 3   | 2   | 2   | 0   | 953   | 1    | 0    | 0    | 0    | 24810   | 1357   | 0.01 | 0.0000 |
| 26      | 80    | 2   | 3   | 2   | 2   | 2   | 1   | 691   | 1    | 0    | 0    | 0    | 18581   | 899    | 0.04 | 0.0000 |
| 27      | 320   | 8   | 7   | 6   | 2   | 4   | 2   | 557   | 19   | 59   | 0    | 0    | 23641   | 1446   | 0.03 | 0.0000 |
| 28      | 128   | 5   | 7   | 5   | 3   | 4   | 1   | 1112  | 16   | 80   | 21   | 18   | 31617   | 1473   | 0.05 | 0.0000 |
| 29      | 79    | 3   | 2   | 3   | 1   | 2   | 1   | 536   | 0    | 0    | 0    | 0    | 13498   | 753    | 0.07 | 0.0000 |
| 30      | 56    | 3   | 3   | 4   | 1   | 2   | 2   | 409   | 24   | 0    | 0    | 0    | 10717   | 2200   | 0.04 | 0.0000 |
| 31      | 148   | 5   | 6   | 4   | 2   | 1   | 1   | 2036  | 0    | 166  | 0    | 0    | 29659   | 2057   | 0.06 | 0.0000 |
| 32      | 64    | 2   | 2   | 4   | 2   | 1   | 0   | 787   | 19   | 0    | 0    | 0    | 15196   | 119    | 0.06 | 0.0000 |
| 33      | 480   | 3   | 5   | 5   | 2   | 2   | 0   | 2006  | 63   | 0    | 0    | 0    | 42581   | 2683   | 0.06 | 0.0019 |
| 34      | 220   | 5   | 4   | 24  | 1   | 2   | 1   | 1229  | 35   | 328  | 156  | 82   | 27006   | 685    | 0.12 | 0.0008 |
| 35      | 280   | 8   | 5   | 14  | 2   | 3   | 2   | 1978  | 84   | 452  | 149  | 0    | 38482   | 2898   | 0.08 | 0.0010 |
| 36      | 64    | 1   | 3   | 1   | 1   | 0   | 0   | 623   | 63   | 0    | 0    | 0    | 14670   | 856    | 0.05 | 0.0000 |
| Average | 131.3 | 4.7 | 4.0 | 7.3 | 1.9 | 1.8 | 0.8 | 927.9 | 21.7 | 99.7 | 21.7 | 18.9 | 22608.8 | 1214.2 | 0.10 | 0.0    |

Year 2012

| DMU<br>Index | Input levels |    |    |    |    |    |    | Output levels |    |    |    |    |       |      |      |        |
|--------------|--------------|----|----|----|----|----|----|---------------|----|----|----|----|-------|------|------|--------|
|              | x2           | x3 | x5 | x6 | x7 | x8 | x9 | y1            | y2 | y3 | y4 | y5 | y6    | y7   | y8   | y9     |
| 1            | 64           | 1  | 1  | 3  | 1  | 1  | 0  | 388           | 20 | 0  | 0  | 0  | 3750  | 417  | 0.01 | 0.0025 |
| 2            | 80           | 4  | 4  | 4  | 4  | 2  | 1  | 901           | 25 | 0  | 0  | 0  | 11465 | 214  | 0.03 | 0      |
| 3            | 52           | 2  | 3  | 5  | 2  | 2  | 1  | 518           | 0  | 0  | 0  | 0  | 18725 | 369  | 0.07 | 0.0016 |
| 4            | 112          | 3  | 2  | 3  | 2  | 1  | 0  | 1035          | 8  | 0  | 0  | 0  | 26218 | 1120 | 0.04 | 0      |
| 5            | 42           | 1  | 3  | 4  | 2  | 1  | 0  | 327           | 4  | 0  | 0  | 0  | 12845 | 449  | 0.11 | 0      |
| 6            | 20           | 1  | 1  | 2  | 1  | 2  | 1  | 71            | 3  | 0  | 0  | 0  | 4941  | 198  | 0.06 | 0      |

|    |     |    |    |    |   |   |   |      |     |      |     |     |       |      |      |        |
|----|-----|----|----|----|---|---|---|------|-----|------|-----|-----|-------|------|------|--------|
| 7  | 54  | 2  | 1  | 3  | 1 | 1 | 0 | 309  | 16  | 0    | 0   | 1   | 6524  | 180  | 0.08 | 0      |
| 8  | 186 | 17 | 11 | 16 | 3 | 2 | 2 | 2594 | 160 | 174  | 55  | 44  | 40443 | 2257 | 0.08 | 0      |
| 9  | 117 | 7  | 6  | 9  | 2 | 2 | 1 | 1493 | 19  | 63   | 27  | 21  | 36120 | 1367 | 0.09 | 0      |
| 10 | 72  | 3  | 3  | 2  | 1 | 2 | 1 | 769  | 14  | 0    | 0   | 0   | 8940  | 325  | 0.13 | 0      |
| 11 | 168 | 6  | 6  | 28 | 2 | 4 | 5 | 2155 | 32  | 0    | 0   | 10  | 48352 | 897  | 0.05 | 0      |
| 12 | 64  | 4  | 2  | 5  | 1 | 1 | 0 | 369  | 0   | 0    | 0   | 0   | 10454 | 58   | 0.03 | 0      |
| 13 | 168 | 7  | 6  | 9  | 3 | 5 | 2 | 970  | 8   | 97   | 0   | 0   | 26464 | 2254 | 0.04 | 0      |
| 14 | 80  | 5  | 5  | 10 | 2 | 3 | 2 | 1302 | 21  | 170  | 0   | 0   | 25060 | 1507 | 0.07 | 0      |
| 15 | 298 | 24 | 7  | 26 | 4 | 4 | 3 | 1772 | 50  | 1187 | 0   | 167 | 46422 | 1891 | 0.12 | 0      |
| 16 | 144 | 8  | 4  | 7  | 2 | 2 | 0 | 722  | 0   | 0    | 0   | 356 | 22498 | 924  | 0.12 | 0      |
| 17 | 56  | 2  | 2  | 3  | 1 | 1 | 0 | 472  | 2   | 0    | 0   | 0   | 12947 | 615  | 0.04 | 0      |
| 18 | 64  | 2  | 3  | 1  | 1 | 1 | 0 | 673  | 9   | 0    | 0   | 0   | 11368 | 561  | 0.06 | 0      |
| 19 | 121 | 4  | 6  | 16 | 1 | 1 | 0 | 845  | 3   | 0    | 0   | 0   | 21834 | 1045 | 0.07 | 0.0036 |
| 20 | 77  | 3  | 4  | 5  | 1 | 1 | 1 | 860  | 0   | 0    | 0   | 0   | 18369 | 1018 | 0.08 | 0      |
| 21 | 64  | 4  | 3  | 4  | 2 | 2 | 1 | 298  | 0   | 0    | 0   | 0   | 8715  | 365  | 0.01 | 0      |
| 22 | 148 | 5  | 4  | 9  | 3 | 3 | 2 | 1310 | 38  | 438  | 0   | 57  | 44795 | 2019 | 0.1  | 0.0016 |
| 23 | 128 | 6  | 5  | 6  | 2 | 2 | 1 | 834  | 9   | 54   | 0   | 0   | 22198 | 972  | 0.08 | 0.0026 |
| 24 | 92  | 6  | 4  | 6  | 3 | 2 | 0 | 521  | 4   | 0    | 312 | 0   | 24310 | 518  | 0.09 | 0      |
| 25 | 50  | 3  | 5  | 2  | 2 | 2 | 0 | 1118 | 7   | 0    | 0   | 0   | 24972 | 830  | 0    | 0.0018 |
| 26 | 80  | 2  | 3  | 2  | 2 | 1 | 0 | 672  | 0   | 0    | 0   | 0   | 17517 | 780  | 0.04 | 0.0015 |
| 27 | 144 | 6  | 7  | 6  | 3 | 3 | 2 | 851  | 30  | 69   | 0   | 0   | 20803 | 5132 | 0.04 | 0      |
| 28 | 144 | 7  | 5  | 5  | 3 | 3 | 1 | 1730 | 12  | 4    | 36  | 36  | 32380 | 1711 | 0.07 | 0      |
| 29 | 74  | 3  | 2  | 3  | 1 | 2 | 1 | 673  | 0   | 0    | 0   | 0   | 13837 | 630  | 0.06 | 0      |
| 30 | 48  | 2  | 4  | 4  | 1 | 2 | 2 | 64   | 13  | 0    | 2   | 1   | 11043 | 1373 | 0.01 | 0      |
| 31 | 192 | 5  | 5  | 6  | 3 | 2 | 1 | 1760 | 0   | 148  | 0   | 0   | 24264 | 1377 | 0.05 | 0      |
| 32 | 74  | 2  | 1  | 3  | 2 | 1 | 0 | 1031 | 32  | 5    | 0   | 0   | 18225 | 105  | 0.06 | 0      |

|         |       |     |     |     |     |     |     |        |      |      |      |      |         |        |      |        |
|---------|-------|-----|-----|-----|-----|-----|-----|--------|------|------|------|------|---------|--------|------|--------|
| 33      | 480   | 8   | 5   | 15  | 3   | 3   | 1   | 3139   | 75   | 365  | 0    | 0    | 53974   | 2685   | 0.07 | 0.0007 |
| 34      | 220   | 6   | 6   | 26  | 1   | 2   | 2   | 1644   | 61   | 337  | 332  | 129  | 29241   | 734    | 0.1  | 0      |
| 35      | 320   | 6   | 5   | 12  | 3   | 4   | 2   | 1836   | 73   | 359  | 213  | 0    | 36965   | 2911   | 0.1  | 0      |
| 36      | 60    | 1   | 4   | 1   | 1   | 1   | 0   | 724    | 63   | 0    | 0    | 0    | 13725   | 918    | 0.14 | 0      |
| Average | 121.0 | 4.9 | 4.1 | 7.5 | 2.0 | 2.1 | 1.0 | 1020.8 | 22.5 | 96.4 | 27.1 | 22.8 | 22519.5 | 1131.3 | 0.1  | 0.0004 |

*x2 - total elective operative hour; x3 - Number of full time ophthalmologist; x5 - Number of assistance medical officer; x6 - Number of nurses; x7 - Number of operating microscope; Number of phacoemulsifier; x9 - Number of vitrectomy devices; y1 - Total number cataract surgery; y2 - Total number glaucoma surgery; y3 - Total number vitreo-retinal surgery; y4 - Total number corneal surgery; y5 - Total number oculoplasty surgery; y - Total number of outpatient cases; y7 - Total number of inpatient cases; y8 - proportion of patients with post-operative visual acuity worse than 6/12 within 3 months following cataract surgery; y9 - infectious endophthalmitis post-cataract surgery per thousand cases*
