# Supplementary material for: Improving the effectiveness of service delivery in the public healthcare sector: the case of ophthalmology services in Malaysia
Source: PubMed Central journal article supplement (PMC4551382; doi:10.1186/s12913-015-1011-0), 2015-08-28
Supplement: 12913_2015_1011_MOESM3_ESM.pdf [file 12913_2015_1011_MOESM3_ESM.pdf]

Additional file 3 DEA efficiency scores of all models by DMU and index year

Year 2011

| DMU<br>Index | DC | Efficiency Score (VRS, Output-Oriented Model) |     |     |     |     |     | Efficiency Score (CRS, Output-Oriented Model) |      |      |      |      |      |
|--------------|----|-----------------------------------------------|-----|-----|-----|-----|-----|-----------------------------------------------|------|------|------|------|------|
|              |    | Ref <sup>1</sup>                              | 1   | 2   | 3   | 4   | 5   | Ref <sup>1</sup>                              | 1    | 2    | 3    | 4    | 5    |
| 1            | 1  | 1.0                                           | 1.0 | 1.1 | 1.0 | 1.0 | 1.0 | 1.47                                          | 1.47 | 1.47 | 1.47 | 1.00 | 1.46 |
| 2            | 1  | 1.2                                           | 1.2 | 1.4 | 1.3 | 1.2 | 1.2 | 1.29                                          | 1.28 | 1.56 | 1.29 | 1.29 | 1.29 |
| 3            | 1  | 1.0                                           | 1.0 | 1.0 | 1.0 | 1.0 | 1.0 | 1.01                                          | 1.01 | 1.01 | 1.01 | 1.00 | 1.01 |
| 4            | 1  | 1.0                                           | 1.0 | 1.0 | 1.0 | 1.0 | 1.0 | 1.00                                          | 1.00 | 1.00 | 1.00 | 1.00 | 1.00 |
| 5            | 0  | 1.0                                           | 1.0 | 1.0 | 1.0 | 1.0 | 1.0 | 1.00                                          | 1.00 | 1.00 | 1.00 | 1.00 | 1.00 |
| 6            | 0  | 1.0                                           | 1.0 | 1.0 | 1.0 | 1.0 | 1.0 | 1.38                                          | 1.38 | 1.56 | 1.38 | 1.00 | 1.38 |
| 7            | 1  | 1.0                                           | 1.0 | 1.1 | 1.0 | 1.0 | 1.0 | 1.35                                          | 1.33 | 1.95 | 1.81 | 1.23 | 1.00 |
| 8            | 1  | 1.0                                           | 1.0 | 1.0 | 1.0 | 1.0 | 1.0 | 1.25                                          | 1.25 | 1.67 | 1.31 | 1.25 | 1.12 |
| 9            | 1  | 1.1                                           | 1.1 | 1.1 | 1.1 | 1.1 | 1.0 | 1.09                                          | 1.09 | 1.20 | 1.16 | 1.09 | 1.00 |
| 10           | 0  | 1.0                                           | 1.0 | 1.0 | 1.0 | 1.0 | 1.0 | 1.02                                          | 1.02 | 1.02 | 1.03 | 1.00 | 1.01 |
| 11           | 1  | 1.0                                           | 1.0 | 1.0 | 1.0 | 1.0 | 1.0 | 1.00                                          | 1.00 | 1.00 | 1.00 | 1.00 | 1.00 |
| 12           | 1  | 1.5                                           | 1.5 | 1.5 | 1.5 | 1.1 | 1.5 | 1.54                                          | 1.54 | 1.54 | 1.54 | 1.06 | 1.54 |
| 13           | 1  | 1.2                                           | 1.2 | 1.2 | 1.3 | 1.2 | 1.2 | 1.50                                          | 1.44 | 1.65 | 1.50 | 1.50 | 1.49 |
| 14           | 1  | 1.0                                           | 1.0 | 1.0 | 1.1 | 1.0 | 1.0 | 1.00                                          | 1.00 | 1.00 | 1.08 | 1.00 | 1.00 |
| 15           | 1  | 1.0                                           | 1.0 | 1.0 | 1.0 | 1.0 | 1.0 | 1.00                                          | 1.00 | 1.00 | 1.18 | 1.00 | 1.00 |
| 16           | 1  | 1.0                                           | 1.0 | 1.0 | 1.0 | 1.0 | 1.0 | 1.00                                          | 1.00 | 1.01 | 1.04 | 1.00 | 1.00 |
| 17           | 1  | 1.0                                           | 1.0 | 1.2 | 1.0 | 1.0 | 1.0 | 1.12                                          | 1.12 | 1.15 | 1.12 | 1.12 | 1.12 |
| 18           | 0  | 1.0                                           | 1.0 | 1.0 | 1.0 | 1.0 | 1.0 | 1.00                                          | 1.00 | 1.19 | 1.00 | 1.00 | 1.00 |
| 19           | 1  | 1.1                                           | 1.1 | 1.7 | 1.1 | 1.1 | 1.1 | 1.20                                          | 1.25 | 1.76 | 1.24 | 1.20 | 1.20 |
| 20           | 1  | 1.5                                           | 1.4 | 1.5 | 1.5 | 1.5 | 1.5 | 1.49                                          | 1.47 | 1.49 | 1.52 | 1.48 | 1.49 |
| 21           | 0  | 1.3                                           | 1.3 | 1.3 | 1.3 | 1.3 | 1.3 | 1.39                                          | 1.39 | 1.44 | 1.39 | 1.39 | 1.39 |
| 22           | 1  | 1.0                                           | 1.0 | 1.0 | 1.0 | 1.0 | 1.0 | 1.02                                          | 1.02 | 1.02 | 1.36 | 1.00 | 1.00 |
| 23           | 1  | 1.3                                           | 1.3 | 1.4 | 1.3 | 1.3 | 1.3 | 1.52                                          | 1.52 | 1.61 | 1.60 | 1.50 | 1.49 |

|         |   |      |      |      |      |      |      |      |      |      |      |      |      |
|---------|---|------|------|------|------|------|------|------|------|------|------|------|------|
| 24      | 1 | 1.0  | 1.0  | 1.3  | 1.4  | 1.0  | 1.0  | 1.00 | 1.00 | 1.31 | 1.77 | 1.00 | 1.00 |
| 25      | 1 | 1.0  | 1.0  | 1.0  | 1.0  | 1.0  | 1.0  | 1.00 | 1.00 | 1.00 | 1.00 | 1.00 | 1.00 |
| 26      | 0 | 1.1  | 1.1  | 1.1  | 1.1  | 1.0  | 1.1  | 1.06 | 1.06 | 1.06 | 1.06 | 1.04 | 1.06 |
| 27      | 1 | 1.7  | 1.7  | 1.7  | 1.7  | 1.6  | 1.7  | 2.08 | 2.08 | 2.16 | 2.21 | 2.05 | 2.07 |
| 28      | 1 | 1.1  | 1.1  | 1.1  | 1.1  | 1.0  | 1.0  | 1.17 | 1.17 | 1.17 | 1.30 | 1.13 | 1.11 |
| 29      | 1 | 1.4  | 1.4  | 1.4  | 1.5  | 1.4  | 1.4  | 1.47 | 1.48 | 1.47 | 1.49 | 1.47 | 1.47 |
| 30      | 1 | 1.0  | 1.0  | 1.0  | 1.0  | 1.0  | 1.0  | 1.00 | 1.00 | 1.00 | 1.00 | 1.00 | 1.00 |
| 31      | 1 | 1.0  | 1.0  | 1.0  | 1.0  | 1.0  | 1.0  | 1.00 | 1.00 | 1.00 | 1.00 | 1.00 | 1.00 |
| 32      | 1 | 1.0  | 1.0  | 1.0  | 1.0  | 1.0  | 1.0  | 1.00 | 1.00 | 1.08 | 1.00 | 1.00 | 1.00 |
| 33      | 1 | 1.0  | 1.0  | 1.0  | 1.0  | 1.0  | 1.0  | 1.00 | 1.00 | 1.00 | 1.00 | 1.00 | 1.00 |
| 34      | 1 | 1.0  | 1.0  | 1.0  | 1.0  | 1.0  | 1.0  | 1.00 | 1.00 | 1.00 | 1.07 | 1.00 | 1.00 |
| 35      | 1 | 1.0  | 1.0  | 1.0  | 1.0  | 1.0  | 1.0  | 1.00 | 1.00 | 1.00 | 1.11 | 1.00 | 1.00 |
| 36      | 0 | 1.00 | 1.00 | 1.00 | 1.00 | 1.00 | 1.00 | 1.00 | 1.00 | 1.00 | 1.00 | 1.00 | 1.00 |
| Average |   | 1.10 | 1.09 | 1.14 | 1.11 | 1.08 | 1.09 | 1.18 | 1.18 | 1.27 | 1.25 | 1.13 | 1.16 |

<sup>1</sup>Reference model built based on initial discussion with two MOH ophthalmologists

DC – centre with day surgery services

**Year 2012**

| DMU<br>Index | DC | Efficiency Score (VRS, Output-Oriented Model) |      |      |      |      |      | Efficiency Score (CRS, Output-Oriented Model) |      |      |      |      |      |
|--------------|----|-----------------------------------------------|------|------|------|------|------|-----------------------------------------------|------|------|------|------|------|
|              |    | Ref <sup>1</sup>                              | 1    | 2    | 3    | 4    | 5    | Ref <sup>1</sup>                              | 1    | 2    | 3    | 4    | 5    |
| 1            | 0  | 1.00                                          | 1.00 | 1.34 | 1.00 | 1.00 | 1.00 | 1.81                                          | 1.64 | 2.15 | 1.81 | 1.00 | 1.81 |
| 2            | 1  | 1.25                                          | 1.42 | 1.25 | 1.32 | 1.20 | 1.25 | 1.26                                          | 1.57 | 1.26 | 1.33 | 1.22 | 1.26 |
| 3            | 1  | 1.04                                          | 1.04 | 1.04 | 1.04 | 1.00 | 1.04 | 1.05                                          | 1.05 | 1.06 | 1.05 | 1.00 | 1.05 |
| 4            | 1  | 1.00                                          | 1.00 | 1.00 | 1.00 | 1.00 | 1.00 | 1.00                                          | 1.00 | 1.00 | 1.00 | 1.00 | 1.00 |
| 5            | 1  | 1.00                                          | 1.00 | 1.00 | 1.00 | 1.00 | 1.00 | 1.00                                          | 1.00 | 1.00 | 1.00 | 1.00 | 1.00 |
| 6            | 1  | 1.00                                          | 1.00 | 1.00 | 1.00 | 1.00 | 1.00 | 1.42                                          | 1.73 | 1.42 | 1.44 | 1.33 | 1.42 |
| 7            | 1  | 1.00                                          | 1.00 | 2.02 | 1.00 | 1.00 | 1.00 | 1.94                                          | 2.05 | 2.15 | 1.95 | 1.70 | 1.93 |
| 8            | 1  | 1.00                                          | 1.00 | 1.00 | 1.00 | 1.00 | 1.00 | 1.00                                          | 1.00 | 1.01 | 1.00 | 1.00 | 1.00 |
| 9            | 1  | 1.00                                          | 1.00 | 1.00 | 1.00 | 1.00 | 1.00 | 1.00                                          | 1.00 | 1.00 | 1.00 | 1.00 | 1.00 |
| 10           | 1  | 1.00                                          | 1.00 | 1.35 | 1.03 | 1.00 | 1.00 | 1.00                                          | 1.00 | 1.36 | 1.03 | 1.00 | 1.00 |
| 11           | 0  | 1.00                                          | 1.00 | 1.00 | 1.00 | 1.00 | 1.00 | 1.00                                          | 1.00 | 1.00 | 1.00 | 1.00 | 1.00 |
| 12           | 1  | 1.35                                          | 1.36 | 1.80 | 1.36 | 1.24 | 1.35 | 1.35                                          | 1.43 | 1.85 | 1.37 | 1.29 | 1.35 |
| 13           | 1  | 1.25                                          | 1.39 | 1.25 | 1.27 | 1.25 | 1.25 | 1.43                                          | 1.44 | 1.46 | 1.43 | 1.38 | 1.37 |
| 14           | 1  | 1.00                                          | 1.00 | 1.00 | 1.00 | 1.00 | 1.00 | 1.00                                          | 1.00 | 1.00 | 1.00 | 1.00 | 1.00 |
| 15           | 1  | 1.00                                          | 1.00 | 1.00 | 1.00 | 1.00 | 1.00 | 1.00                                          | 1.00 | 1.00 | 1.21 | 1.00 | 1.00 |
| 16           | 0  | 1.00                                          | 1.00 | 1.08 | 1.01 | 1.00 | 1.00 | 1.00                                          | 1.00 | 1.14 | 1.24 | 1.00 | 1.00 |
| 17           | 1  | 1.00                                          | 1.00 | 1.11 | 1.00 | 1.00 | 1.00 | 1.05                                          | 1.07 | 1.16 | 1.06 | 1.03 | 1.05 |
| 18           | 0  | 1.00                                          | 1.00 | 1.00 | 1.00 | 1.00 | 1.00 | 1.00                                          | 1.00 | 1.13 | 1.00 | 1.00 | 1.00 |
| 19           | 1  | 1.00                                          | 1.00 | 1.66 | 1.00 | 1.00 | 1.00 | 1.00                                          | 1.00 | 1.83 | 1.00 | 1.00 | 1.00 |
| 20           | 1  | 1.00                                          | 1.00 | 1.13 | 1.00 | 1.00 | 1.00 | 1.00                                          | 1.00 | 1.13 | 1.00 | 1.00 | 1.00 |
| 21           | 1  | 2.09                                          | 2.86 | 2.09 | 2.13 | 2.07 | 2.09 | 2.15                                          | 2.86 | 2.15 | 2.18 | 2.15 | 2.15 |
| 22           | 1  | 1.00                                          | 1.00 | 1.00 | 1.00 | 1.00 | 1.00 | 1.00                                          | 1.00 | 1.00 | 1.00 | 1.00 | 1.00 |
| 23           | 1  | 1.44                                          | 1.44 | 1.77 | 1.44 | 1.40 | 1.44 | 1.45                                          | 1.45 | 1.88 | 1.45 | 1.42 | 1.45 |
| 24           | 1  | 1.00                                          | 1.00 | 1.00 | 1.00 | 1.00 | 1.00 | 1.00                                          | 1.00 | 1.00 | 1.07 | 1.00 | 1.00 |
| 25           | 1  | 1.00                                          | 1.00 | 1.00 | 1.00 | 1.00 | 1.00 | 1.00                                          | 1.00 | 1.00 | 1.00 | 1.00 | 1.00 |
| 26           | 1  | 1.08                                          | 1.08 | 1.12 | 1.08 | 1.07 | 1.08 | 1.11                                          | 1.11 | 1.12 | 1.11 | 1.11 | 1.11 |

|         |   |      |      |      |      |      |      |      |      |      |      |      |      |
|---------|---|------|------|------|------|------|------|------|------|------|------|------|------|
| 27      | 1 | 1.00 | 1.00 | 1.00 | 1.00 | 1.00 | 1.00 | 1.00 | 1.00 | 1.00 | 1.00 | 1.00 | 1.00 |
| 28      | 1 | 1.00 | 1.00 | 1.00 | 1.00 | 1.00 | 1.00 | 1.00 | 1.00 | 1.00 | 1.00 | 1.00 | 1.00 |
| 29      | 1 | 1.00 | 1.00 | 1.26 | 1.00 | 1.00 | 1.00 | 1.01 | 1.08 | 1.26 | 1.04 | 1.00 | 1.01 |
| 30      | 1 | 1.00 | 1.00 | 1.00 | 1.00 | 1.00 | 1.00 | 1.00 | 1.00 | 1.00 | 1.00 | 1.00 | 1.00 |
| 31      | 1 | 1.00 | 1.00 | 1.00 | 1.00 | 1.00 | 1.00 | 1.00 | 1.07 | 1.13 | 1.00 | 1.00 | 1.00 |
| 32      | 1 | 1.00 | 1.00 | 1.00 | 1.00 | 1.00 | 1.00 | 1.00 | 1.00 | 1.00 | 1.00 | 1.00 | 1.00 |
| 33      | 1 | 1.00 | 1.00 | 1.00 | 1.00 | 1.00 | 1.00 | 1.00 | 1.00 | 1.29 | 1.00 | 1.00 | 1.00 |
| 34      | 1 | 1.00 | 1.00 | 1.00 | 1.00 | 1.00 | 1.00 | 1.00 | 1.00 | 1.00 | 1.00 | 1.00 | 1.00 |
| 35      | 1 | 1.00 | 1.00 | 1.00 | 1.00 | 1.00 | 1.00 | 1.00 | 1.00 | 1.00 | 1.00 | 1.00 | 1.00 |
| 36      | 1 | 1.00 | 1.00 | 1.00 | 1.00 | 1.00 | 1.00 | 1.00 | 1.00 | 1.00 | 1.00 | 1.00 | 1.00 |
| Average |   | 1.07 | 1.10 | 1.17 | 1.07 | 1.06 | 1.07 | 1.14 | 1.18 | 1.25 | 1.16 | 1.10 | 1.14 |

<sup>1</sup>Reference model built based on initial discussion with two MOH ophthalmologists

DC – centre with day surgery services
