# Supplementary material for: Improving the effectiveness of service delivery in the public healthcare sector: the case of ophthalmology services in Malaysia
Source: PubMed Central journal article supplement (PMC4551382; doi:10.1186/s12913-015-1011-0), 2015-08-28
Supplement: 12913_2015_1011_MOESM4_ESM.pdf [file 12913_2015_1011_MOESM4_ESM.pdf]

Additional file 4 - Scale type, scale and congestion efficiency score by DMU and index year

| Year 2011 |                        |                       |                             | Year 2012 |                         |                        |                              |
|-----------|------------------------|-----------------------|-----------------------------|-----------|-------------------------|------------------------|------------------------------|
| DMU Index | Scale Efficiency Score | Scale Efficiency Type | Congestion Efficiency Score | DMU Index | Scale Efficiency Score* | Scale Efficiency Type* | Congestion Efficiency Score* |
| 1         | 1.47                   | drs                   | 1.00                        | 1         | 1.81                    | irs                    | 1.00                         |
| 2         | 1.06                   | drs                   | 1.22                        | 2         | 1.01                    | drs                    | 1.25                         |
| 3         | 1.01                   | drs                   | 1.00                        | 3         | 1.01                    | drs                    | 1.04                         |
| 4         | 1.00                   | crs                   | 1.00                        | 4         | 1.00                    | crs                    | 1.00                         |
| 5         | 1.00                   | crs                   | 1.00                        | 5         | 1.00                    | crs                    | 1.00                         |
| 6         | 1.38                   | drs                   | 1.00                        | 6         | 1.42                    | drs                    | 1.00                         |
| 7         | 1.35                   | drs                   | 1.00                        | 7         | 1.94                    | drs                    | 1.00                         |
| 8         | 1.25                   | drs                   | 1.00                        | 8         | 1.00                    | crs                    | 1.00                         |
| 9         | 1.02                   | drs                   | 1.07                        | 9         | 1.00                    | crs                    | 1.00                         |
| 10        | 1.02                   | drs                   | 1.00                        | 10        | 1.00                    | crs                    | 1.00                         |
| 11        | 1.00                   | crs                   | 1.00                        | 11        | 1.00                    | crs                    | 1.00                         |
| 12        | 1.04                   | drs                   | 1.47                        | 12        | 1.00                    | drs                    | 1.35                         |
| 13        | 1.22                   | drs                   | 1.23                        | 13        | 1.14                    | drs                    | 1.25                         |
| 14        | 1.00                   | crs                   | 1.00                        | 14        | 1.00                    | crs                    | 1.00                         |
| 15        | 1.00                   | crs                   | 1.00                        | 15        | 1.00                    | crs                    | 1.00                         |
| 16        | 1.00                   | crs                   | 1.00                        | 16        | 1.00                    | crs                    | 1.00                         |
| 17        | 1.12                   | irs                   | 1.00                        | 17        | 1.05                    | irs                    | 1.00                         |
| 18        | 1.00                   | crs                   | 1.00                        | 18        | 1.00                    | crs                    | 1.00                         |
| 19        | 1.06                   | drs                   | 1.13                        | 19        | 1.00                    | crs                    | 1.00                         |
| 20        | 1.00                   | drs                   | 1.48                        | 20        | 1.00                    | crs                    | 1.00                         |
| 21        | 1.09                   | drs                   | 1.28                        | 21        | 1.03                    | drs                    | 2.09                         |
| 22        | 1.02                   | drs                   | 1.00                        | 22        | 1.00                    | crs                    | 1.00                         |
| 23        | 1.17                   | drs                   | 1.31                        | 23        | 1.00                    | drs                    | 1.44                         |
| 24        | 1.00                   | crs                   | 1.00                        | 24        | 1.00                    | crs                    | 1.00                         |
| 25        | 1.00                   | crs                   | 1.00                        | 25        | 1.00                    | crs                    | 1.00                         |
| 26        | 1.01                   | drs                   | 1.05                        | 26        | 1.03                    | drs                    | 1.08                         |
| 27        | 1.24                   | drs                   | 1.67                        | 27        | 1.00                    | crs                    | 1.00                         |
| 28        | 1.08                   | drs                   | 1.09                        | 28        | 1.00                    | crs                    | 1.00                         |
| 29        | 1.03                   | drs                   | 1.44                        | 29        | 1.01                    | drs                    | 1.00                         |
| 30        | 1.00                   | crs                   | 1.00                        | 30        | 1.00                    | crs                    | 1.00                         |
| 31        | 1.00                   | crs                   | 1.00                        | 31        | 1.00                    | crs                    | 1.00                         |
| 32        | 1.00                   | crs                   | 1.00                        | 32        | 1.00                    | crs                    | 1.00                         |
| 33        | 1.00                   | crs                   | 1.00                        | 33        | 1.00                    | crs                    | 1.00                         |
| 34        | 1.00                   | crs                   | 1.00                        | 34        | 1.00                    | crs                    | 1.00                         |
| 35        | 1.00                   | crs                   | 1.00                        | 35        | 1.00                    | crs                    | 1.00                         |
| 36        | 1.00                   | crs                   | 1.00                        | 36        | 1.00                    | crs                    | 1.00                         |
|           | 1.07                   |                       | 1.07                        |           | 1.07                    |                        | 1.05                         |

\*Congestion efficiency score were calculated using VRS model ; crs = constant return to scale; drs = decreasing return to scale; vrs = variable return to scale
