# Supplementary material for: Improving the effectiveness of service delivery in the public healthcare sector: the case of ophthalmology services in Malaysia
Source: Springer Nature journal article supplement (doi:10.1186/s12913-015-1011-0), 2015-08-27
Supplement: MOESM5 [file 9757600]

**Additional file 5 - VRS technical efficiency scores under standard DEA and bootstrap DEA with the respective rankings.**

The rectangular boxes indicate the agreement between the inefficient DMUs identified by standard DEA (ES < 1) and the low performing DMUs identified by bootstrap DEA.

| 2011                      |             |                            |              |                          | 2012                      |             |                            |              |                          |
|---------------------------|-------------|----------------------------|--------------|--------------------------|---------------------------|-------------|----------------------------|--------------|--------------------------|
| DMU ranked by sDEA VRS ES | sDEA VRS ES | DMU ranked by bsDEA VRS ES | bsDEA VRS ES | % Agreement <sup>1</sup> | DMU ranked by sDEA VRS ES | sDEA VRS ES | DMU ranked by bsDEA VRS ES | bsDEA VRS ES | % Agreement <sup>1</sup> |
| 27                        | 1.67        | 27                         | 1.78         | 100.0%                   | 21                        | 2.09        | 21                         | 2.17         | 85.7%                    |
| 12                        | 1.47        | 12                         | 1.57         |                          | 23                        | 1.44        | 23                         | 1.5          |                          |
| 20                        | 1.48        | 20                         | 1.57         |                          | 12                        | 1.35        | 12                         | 1.41         |                          |
| 29                        | 1.44        | 29                         | 1.53         |                          | 2                         | 1.25        | 2                          | 1.31         |                          |
| 23                        | 1.31        | 23                         | 1.38         |                          | 13                        | 1.25        | 13                         | 1.31         |                          |
| 21                        | 1.28        | 21                         | 1.36         |                          | 26                        | 1.08        | 26                         | 1.13         |                          |
| 2                         | 1.22        | 19                         | 1.2          |                          | 3                         | 1.04        | 6                          | 1.09         |                          |
| 13                        | 1.23        | 2                          | 1.29         |                          | 25                        | 1           | 32                         | 1.09         |                          |
| 19                        | 1.13        | 13                         | 1.29         |                          | 27                        | 1           | 16                         | 1.09         |                          |
| 28                        | 1.09        | 28                         | 1.16         |                          | 28                        | 1           | 24                         | 1.09         |                          |
| 9                         | 1.07        | 9                          | 1.14         |                          | 29                        | 1           | 34                         | 1.09         |                          |
| 26                        | 1.05        | 26                         | 1.12         |                          | 30                        | 1           | 18                         | 1.09         |                          |
| 36                        | 1           | 11                         | 1.12         |                          | 31                        | 1           | 7                          | 1.09         |                          |
| 10                        | 1           | 33                         | 1.11         |                          | 32                        | 1           | 27                         | 1.09         |                          |
| 11                        | 1           | 17                         | 1.11         | 33                       | 1                         | 36          | 1.09                       |              |                          |
| 14                        | 1           | 4                          | 1.11         | 34                       | 1                         | 5           | 1.09                       |              |                          |
| 15                        | 1           | 30                         | 1.11         | 35                       | 1                         | 30          | 1.09                       |              |                          |
| 16                        | 1           | 18                         | 1.11         | 36                       | 1                         | 1           | 1.09                       |              |                          |
| 17                        | 1           | 1                          | 1.11         | 24                       | 1                         | 15          | 1.09                       |              |                          |
| 18                        | 1           | 31                         | 1.11         | 6                        | 1                         | 20          | 1.08                       |              |                          |
| 22                        | 1           | 5                          | 1.11         | 7                        | 1                         | 31          | 1.08                       |              |                          |
| 24                        | 1           | 35                         | 1.11         | 8                        | 1                         | 9           | 1.08                       |              |                          |
| 25                        | 1           | 15                         | 1.11         | 9                        | 1                         | 3           | 1.08                       |              |                          |
| 30                        | 1           | 16                         | 1.11         | 10                       | 1                         | 8           | 1.08                       |              |                          |
| 31                        | 1           | 34                         | 1.11         | 11                       | 1                         | 17          | 1.08                       |              |                          |
| 32                        | 1           | 24                         | 1.11         | 14                       | 1                         | 14          | 1.08                       |              |                          |

|    |   |    |      |    |   |    |      |
|----|---|----|------|----|---|----|------|
| 33 | 1 | 6  | 1.11 | 15 | 1 | 11 | 1.08 |
| 34 | 1 | 36 | 1.11 | 16 | 1 | 25 | 1.08 |
| 35 | 1 | 7  | 1.11 | 17 | 1 | 19 | 1.08 |
| 5  | 1 | 14 | 1.1  | 18 | 1 | 33 | 1.08 |
| 6  | 1 | 22 | 1.1  | 19 | 1 | 4  | 1.08 |
| 7  | 1 | 25 | 1.1  | 20 | 1 | 22 | 1.08 |
| 8  | 1 | 10 | 1.1  | 22 | 1 | 35 | 1.08 |
| 3  | 1 | 8  | 1.09 | 5  | 1 | 28 | 1.07 |
| 4  | 1 | 32 | 1.09 | 4  | 1 | 29 | 1.05 |
| 1  | 1 | 3  | 1.08 | 1  | 1 | 10 | 1.04 |

<sup>1</sup>% Agreement - the proportion of DMU ranked by bsDEA that agrees with the inefficient DMU (ES < 1)

DMU = decision making unit, i.e. 36 ophthalmology centres

VRS = variable return to scale model

sDEA = standard DEA

bsDEA = bootstrap DEA
